# Supplementary material for: Emulsifier-modulated covalent organic frameworks for photocatalytic degradation of organic dyes
Source: Royal Society of Chemistry journal article supplement (doi:10.1039/d2nj05225c), 2022-12-23
Supplement: d2nj05225c1.pdf [file d2nj05225c1.pdf]

## Supporting Information

### **Emulsifier-modulated covalent organic frameworks for photocatalytic degradation of organic dyes**

Xiaoqin Li,<sup>a</sup> Xueqin Chen<sup>\*a</sup>, Cao Li,<sup>a,c</sup> Ziqiang Xu<sup>\*a,c</sup>, Bingbing Jiang<sup>\*a,b,c</sup>

Key Laboratory of Polymer Materials in hubei, Hubei Collaborative Innovation Center for Advanced Organic Chemical Materials, Key Laboratory of Green Preparation and Application of Functional Materials, Hubei , School of Materials Science & Engineering, Hubei University, Wuhan 430062, China.

**E-mail:** 20120073@hubu.edu.cn, ziqiang.xu@hubu.edu.cn, bingbingjiang@hubu.edu.cn;

## **Table of contents**

1. PXRD patterns of COF, COF-Triton X-100, COF-SDS, COF-PVA. (Figure S1)
2. UV-vis absorption spectra of MB solution by COF-SDS (a), COF-PVA (b). (Figure S2)
3. Reusability of COF for the photocatalytic degradation of MB solution. (Figure S3)

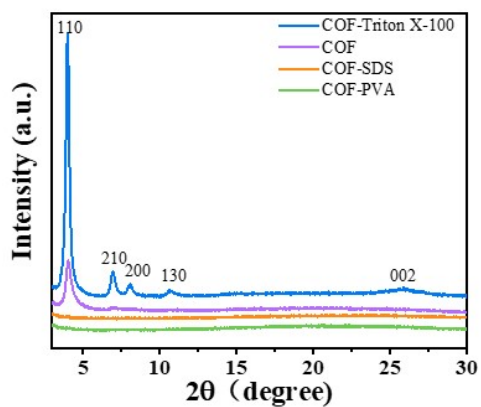

Figure S1. PXRD patterns of COF, COF-Triton X-100, COF-SDS, COF-PVA.

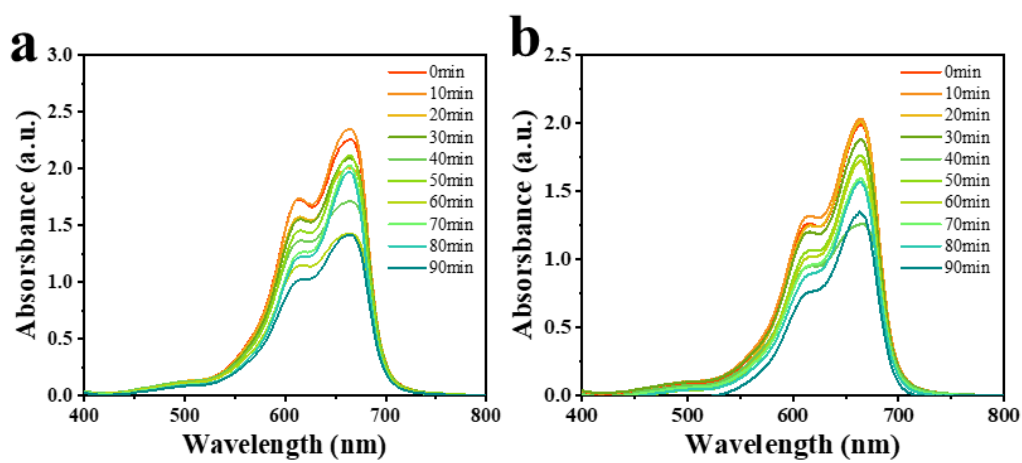

Figure S2. UV-vis absorption spectra of MB solution by COF-SDS (a), COF-PVA (b).

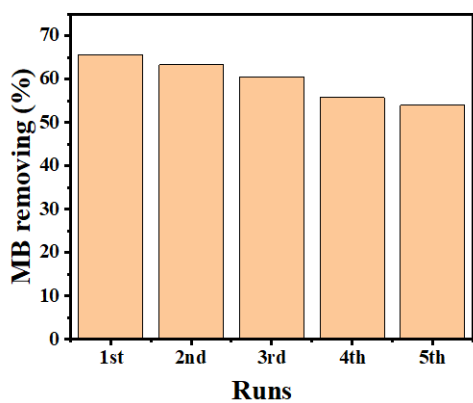

Figure S3. Reusability of COF for the photocatalytic degradation of MB solution.
